# Supplementary material for: Reversion of Ceftazidime Resistance in Pseudomonas aeruginosa under Clinical Setting
Source: MDPI journal article supplement (doi:10.3390/microorganisms10122395), 2022-12-02
Supplement: s1 [file s1]

Fig. S2

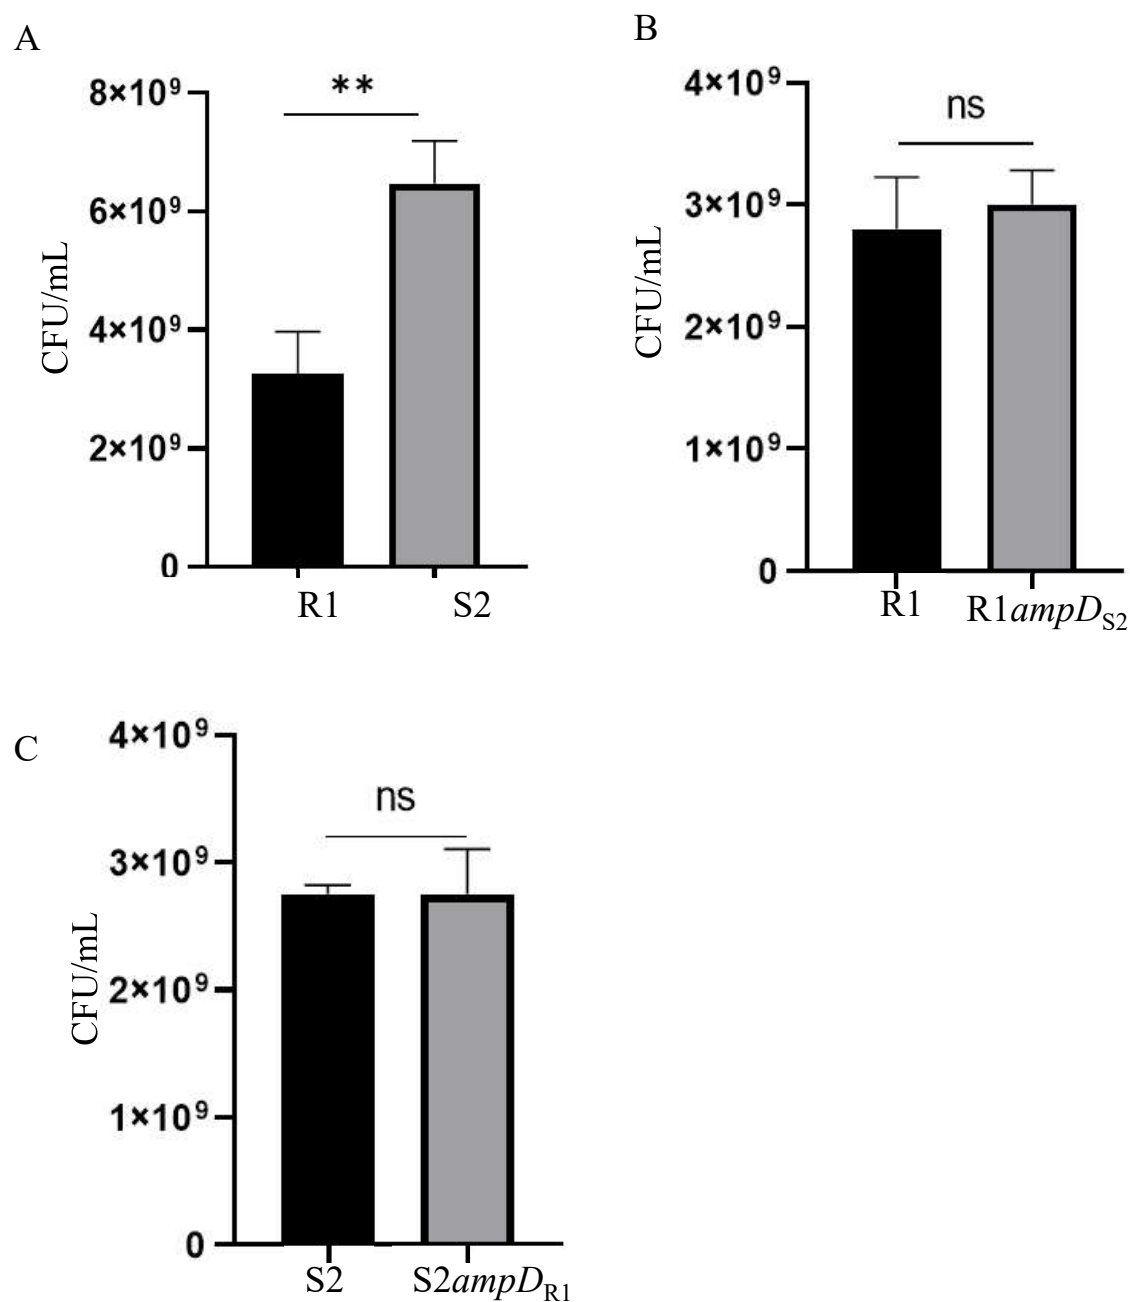

**Fig. S2.** Individual growth of R1, S2 (A), R1,  $R1ampD_{S2}$  (B) and S2,  $S2ampD_{R1}$  (C) strains in L-broth medium under otherwise the competition condition. ns, not significant; \*\*,  $p < 0.01$ , by Student's  $t$  test.
