# Supplementary figures and images for: Reversion of Ceftazidime Resistance in Pseudomonas aeruginosa under Clinical Setting
Source: MDPI journal article supplement (doi:10.3390/microorganisms10122395), 2022-12-02

Fig. S1

A

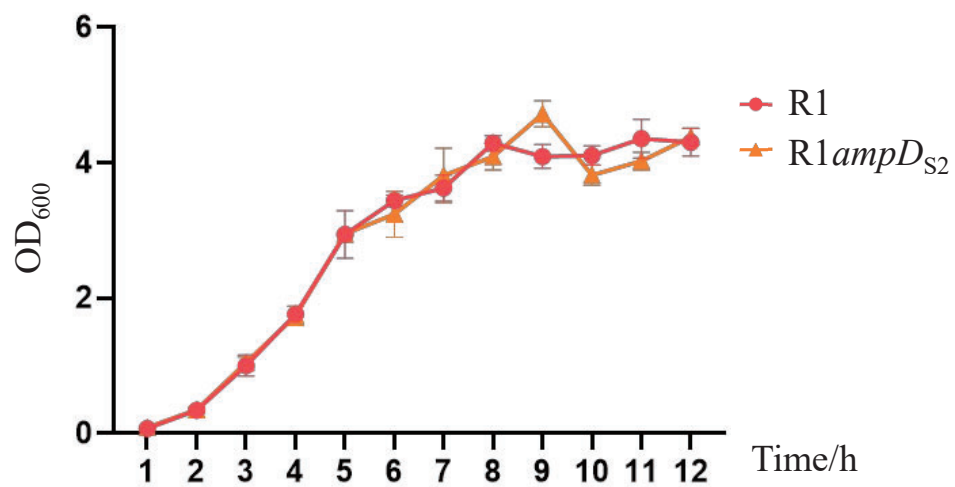

B

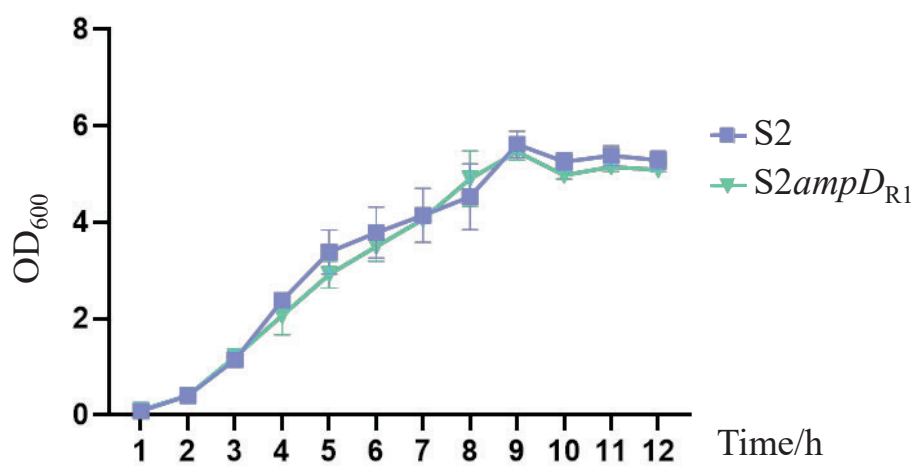

**Fig. S1.** Growth curves of R1, R1ampD<sub>S2</sub> (A) and S2, S2ampD<sub>R1</sub> (B) strains in L-broth medium.

Supplement: s1 [file s1]
